# Supplementary material for: Primum non nocere: shared informed decision making in low back pain – a pilot cluster randomised trial
Source: PubMed Central journal article supplement (PMC4247192; doi:10.1186/1471-2474-15-282), 2014-08-21

# Cost effectiveness plane

1000 bootstrap samples

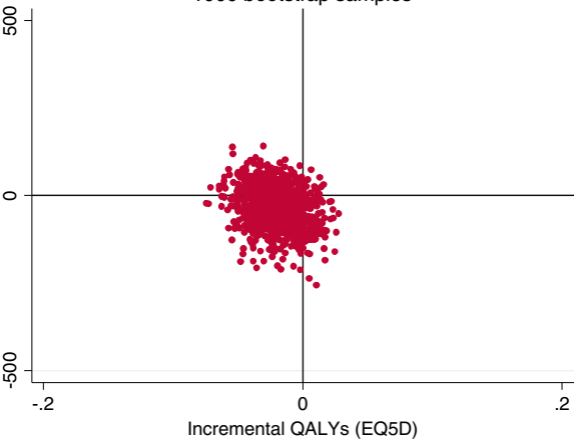

Supplement: 12891_2014_2315_MOESM8_ESM.pdf [file 12891_2014_2315_MOESM8_ESM.pdf]
